# Supplementary material for: Association between Pregnancy Loss and Urinary Phthalate Levels around the Time of Conception
Source: PubMed Central journal article supplement (PMC3295336; doi:10.1289/ehp.1103552), 2011-11-23
Supplement: ehp.1103552.s001.pdf [file ehp.1103552.s001.pdf]

## **Supplementary material**

### **Association between Pregnancy Loss and Urinary Phthalate Levels around the Time of Conception**

Gunnar Toft, Bo A.G. Jönsson, Christian H. Lindh, Tina Kold Jensen, Niels H. Hjollund, Anne Vested, and Jens Peter Bonde.

#### **Contents:**

|                                 |   |
|---------------------------------|---|
| Supplementary Material, Table 1 | 2 |
| Supplementary Material, Table 2 | 3 |

**Supplementary Material, Table 1 :** Mass spectrometric parameters, precision and detection limits for analyses of phthalate metabolites.

| Compound                                                     | Mass fragment | Declustering potential (V) | Colission energy (V) | Precision <sup>a</sup> (%) | Detection <sup>b</sup> limit (ng/ml) |
|--------------------------------------------------------------|---------------|----------------------------|----------------------|----------------------------|--------------------------------------|
| Monoethyl phthalate                                          | 193.1/77.2    | -26                        | -28                  | 11                         | 1                                    |
| Monobutyl phthalate                                          | 221.1/71.1    | -26                        | -22                  | 11                         | 5                                    |
| Monobenzyl phthalate                                         | 255.1/104.8   | -26                        | -22                  | 9                          | 1                                    |
| Monoethylhexyl phthalate (MEHP)                              | 277.3/134.3   | -26                        | -24                  | 7                          | 2                                    |
| 5-hydroxy-MEHP                                               | 293.3/121.0   | -16                        | -24                  | 10                         | 0.2                                  |
| 5-oxo-MEHP                                                   | 291.3/77.0    | -11                        | -40                  | 34                         | 0.6                                  |
| <sup>2</sup> H <sub>4</sub> -Monoethyl phthalate             | 197.1/125.0   | -26                        | -17                  | -                          | -                                    |
| <sup>2</sup> H <sub>4</sub> -Monobutyl phthalate             | 225.3/70.8    | -26                        | -22                  | -                          | -                                    |
| <sup>13</sup> C <sub>4</sub> -Monobenzyl phthalate           | 259.0/107.0   | -26                        | -18                  | -                          | -                                    |
| <sup>2</sup> H <sub>4</sub> -Monoethylhexyl phthalate (MEHP) | 281.3/136.8   | -26                        | -22                  | -                          | -                                    |
| <sup>13</sup> C <sub>4</sub> -5-hydroxy-MEHP                 | 297.3/123.8   | -30                        | -25                  | -                          | -                                    |
| <sup>13</sup> C <sub>4</sub> -5-oxo-MEHP                     | 295.3/124.0   | -35                        | -26                  | -                          | -                                    |

<sup>a</sup> Coefficient of variation of concentrations obtained in quality control samples analyzed in all analysis series.

<sup>b</sup> Concentration corresponding to three times the standard deviation of the chemical blanks

### Supplementary Material, Table 2

Distribution of potential confounders according to exposure to MEHP in the cycle where women achieved a pregnancy (conception cycle). The group limits are based on tertiles of MEHP exposure in samples from the conception cycle.

| Potential confounders                              | 1 <sup>st</sup> group<br>n=42<br><LOD-9.9 ng/ml | 2 <sup>nd</sup> group<br>n=43<br>9.9 – 22.0 ng/ml | 3 <sup>rd</sup> group<br>n=43<br>22.0 -64.0 ng/ml | p-value <sup>a</sup> |
|----------------------------------------------------|-------------------------------------------------|---------------------------------------------------|---------------------------------------------------|----------------------|
| Age at enrollment in the study. Mean (min; max)    | 26.0 (21; 35)                                   | 25.1 (19; 32)                                     | 25.1 (20; 31)                                     | 0.44                 |
| Alcohol (drinks/week). Mean (min; max)             | 4.8 (0; 39)                                     | 4.6 (0; 35)                                       | 4.9 (0; 15)                                       | 0.93                 |
| Smoking (cigarettes/day). Mean (min; max)          | 1.4 (0; 20)                                     | 4.4 (0; 20)                                       | 1.5 (0; 17)                                       | 0.001                |
| Caffeine intake (mg caffeine/day). Mean (min; max) | 273 (25; 973)                                   | 354 (0; 1017)                                     | 289 (6; 906)                                      | 0.21                 |
| % with BMI <20.0                                   | 21.4                                            | 30.2                                              | 20.9                                              | 0.93                 |
| % with BMI 20.0-25.0                               | 61.9                                            | 55.8                                              | 62.8                                              |                      |
| % with BMI >25.0                                   | 16.7                                            | 14.0                                              | 16.3                                              |                      |

<sup>a</sup> ANOVA for continuous data and chi square test for categorical data.
